# Supplementary material for: Efficient degradation of organic dyes using peroxymonosulfate activated by magnetic graphene oxide
Source: Royal Society of Chemistry journal article supplement (doi:10.1039/d2ra03511a), 2022-01-01
Supplement: d2ra03511a1.pdf [file d2ra03511a1.pdf]

Supplementary Materials for:

**Efficient degradation of organic dyes using peroxymonosulfate activated by  
magnetic graphene oxide**

Yawei Shi, Haonan Wang, Guobin Song, Yi Zhang, Liya Tong, Ya Sun and

Guanghui Ding\*

*College of Environmental Science and Engineering, Dalian Maritime University,*

*Dalian 116026, China*

\* Corresponding author.

E-mail addresses: [guanghuiding@dlmu.edu.cn](mailto:guanghuiding@dlmu.edu.cn) (G. Ding)

## Text S1 Materials and characterizations

Coomassie brilliant blue G250 (CBB), methylene blue (MB), Rhodamine B (RhB), basic blue 17 (BB17), methyl orange (MO) and disodium hydrogen phosphate ( $\text{Na}_2\text{HPO}_4$ , 99%) were purchased from J&K Co., Ltd. Potassium peroxomonosulfate (PMS,  $2\text{KHSO}_5 \cdot \text{KHSO}_4 \cdot \text{K}_2\text{SO}_4$ ,  $\text{KHSO}_5 \geq 42.8\%$ ), tert-butanol (TBA, 99%), furfuryl alcohol (FFA, 98%), benzoquinone (BQ, 99%) and methyl phenyl sulfoxide (PMSO, 98%) were obtained from Aladdin Co., Ltd. Methanol (99.5%) and sodium sulfate ( $\text{Na}_2\text{SO}_4$ , 99%) were purchased from Tianjin Fuchen Chemical Reagent Co., Ltd. Sodium chloride ( $\text{NaCl}$ , 99.5%) and sodium bicarbonate ( $\text{NaHCO}_3$ , 99.5%) were obtained from Tianjin Guangfu Chemical Reagents and Tianjin Tianhe Chemical Reagents, respectively. Ethanol (99.7%), sulfuric acid ( $\text{H}_2\text{SO}_4$ , AR), sodium hydroxide ( $\text{NaOH}$ , 96%) and deuterium oxide ( $\text{D}_2\text{O}$ , 99.9%) were obtained from Tianjin Keman Reagents, Tianjin Kemiou Reagents, Tianjin Jinfeng Reagents and Shanghai Yien Reagents, respectively. Nafion<sup>®</sup> solution (5 wt.%) was purchased from Dupont. Tap water was obtained in Dalian Maritime University and used directly. Lake water and sea water were derived from the Xinhai Lake on campus of Dalian Maritime University and the Heishijiao Bay of Dalian respectively and treated with 0.22  $\mu\text{m}$  membrane filters before use. Deionized water was used except for the experiments with real waters.

The specific surface areas ( $S_{\text{BET}}$ ) were calculated using the Brunauer–Emmett–Teller (BET) method by selecting the suitable relative pressure ranges to obtain correlation coefficients ( $r$ ) larger than 0.999 and positive C constants. The total pore

volumes ( $V_t$ ) were derived from the saturated points on the isotherms. The average pore sizes ( $D_p$ ) were calculated by  $D_p = 4V_t/S_{BET}$ . For the open circuit potential (OCP) test, 50  $\mu$ L Nafion was added into 650  $\mu$ L ethanol and then mixed with 10 mg MGO catalyst. After ultrasound treatment for 60min, 50  $\mu$ L of the mixture was withdrawn, dripped on a glassy carbon electrode (GCE) and dried naturally. The MGO coated GCE (MGO-GCE) was obtained by repeating the dripping step three times and then dipped in 0.1 M  $\text{Na}_2\text{SO}_4$  overnight to maintaining a stable potential. The open circuit potential (OCP) of MGO-GCE was monitored using Ag/AgCl as the reference electrode and Pt sheet as the counter electrode in 0.1 M  $\text{Na}_2\text{SO}_4$ . PMS (20 mM) and CBB (50 mg/L) was added into the solution at  $\sim 100$  s and  $\sim 1000$  s respectively.

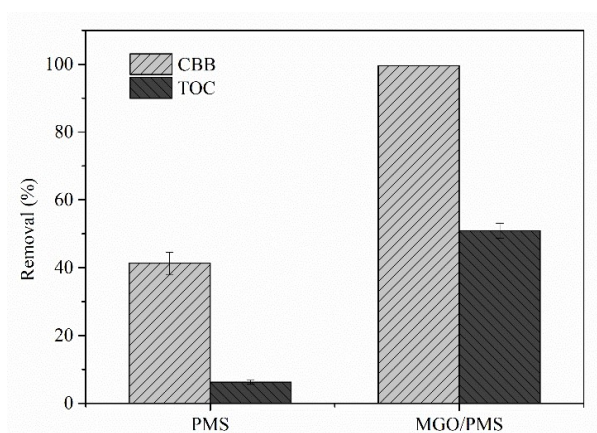

**Figure S1** CBB and TOC removals obtained with PMS and the MGO/PMS system

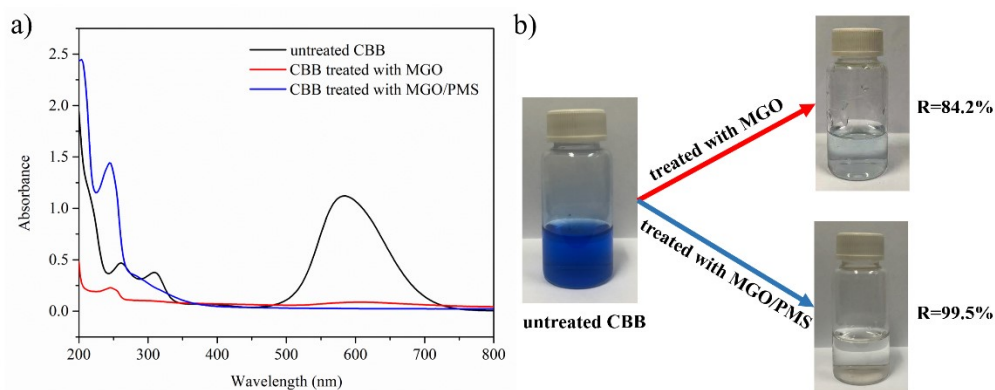

**Figure S2** The UV-visible spectra of parent CBB, CBB after adsorption and CBB after catalytic oxidation (a) and the optical photos before and after treatment (b)

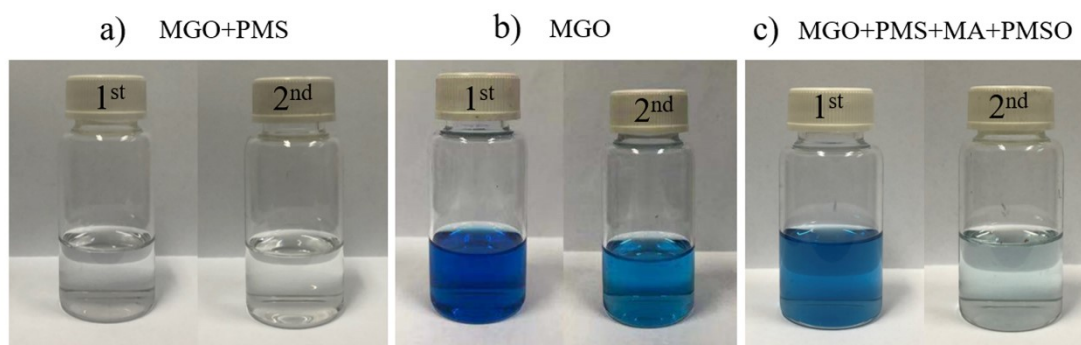

**Figure S3** Optical photos of the ethanol samples after two consecutive extractions of spent MGO in different reaction systems

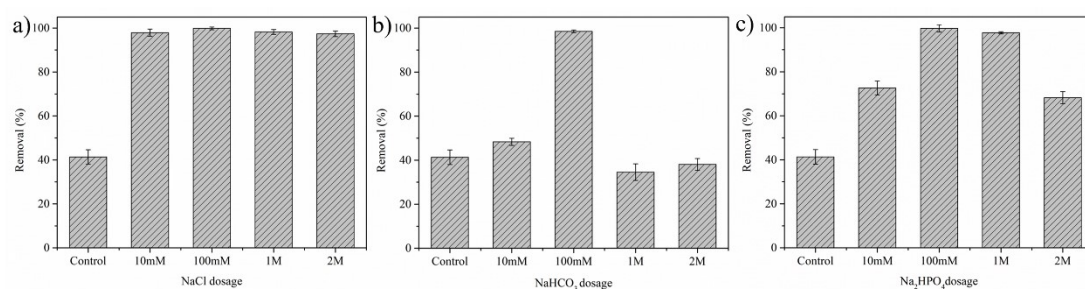

**Figure S4** Effects of  $\text{Cl}^-$  (a),  $\text{HCO}_3^-$  (b) and  $\text{HPO}_4^{2-}$  (c) on CBB oxidation with PMS only. Experimental conditions: PMS dosage = 2 mM, initial CBB concentration = 50 mg/L, temperature = 25 °C.

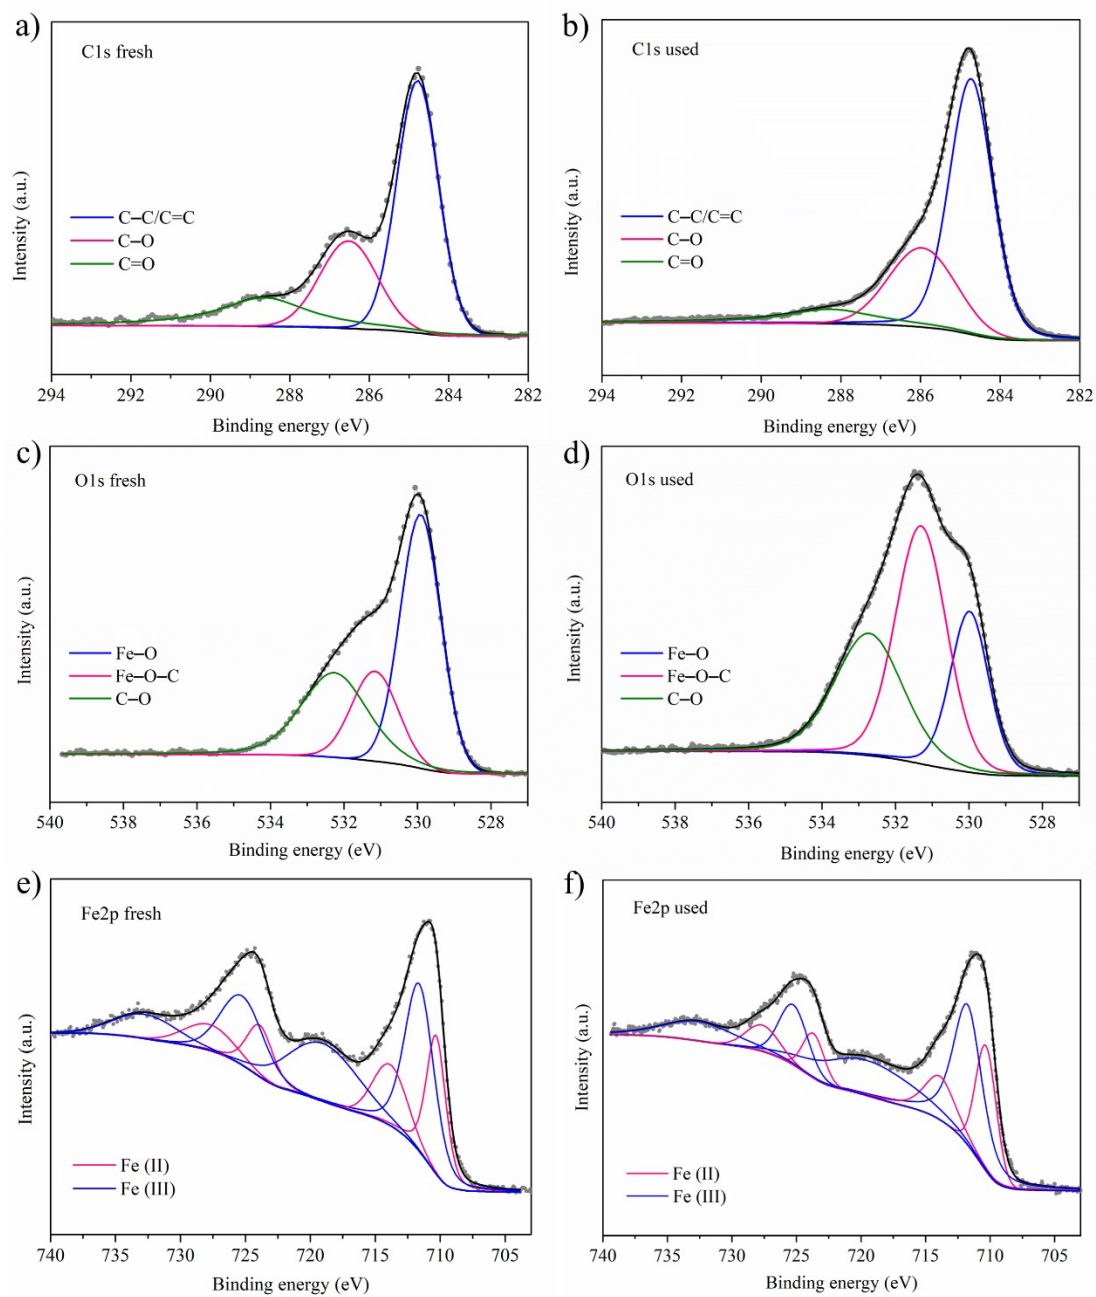

**Figure S5** Deconvolution of C1s (a, b), O1s (c, d) and Fe2p (e, f) spectra for fresh and used MGO

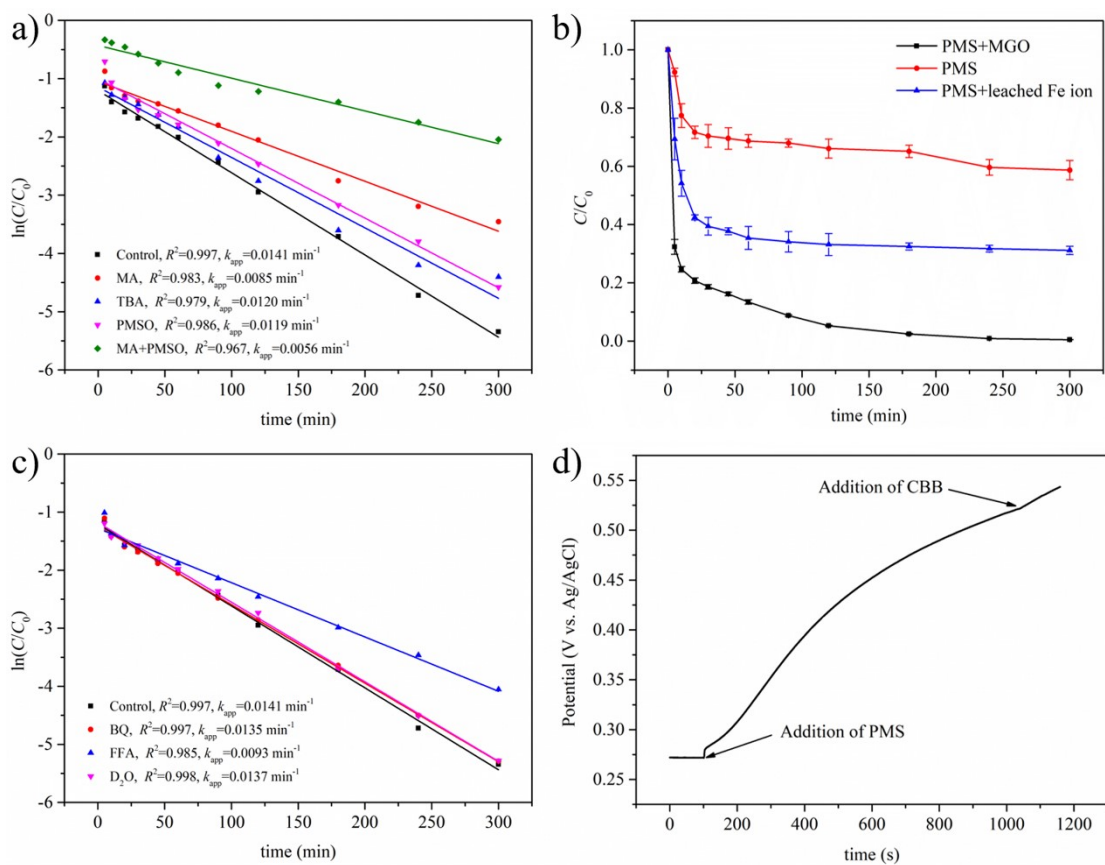

**Figure S6** Pseudo-first-order model fitting of CBB removal in the MGO/PMS system with MA, TBA and PMSO (a), effect of leached ions on CBB removal (b), pseudo-first-order model fitting of CBB removal with BQ, FFA and  $D_2O$  (c), and the open circuit potential-time curve on MGO-GCE (d).

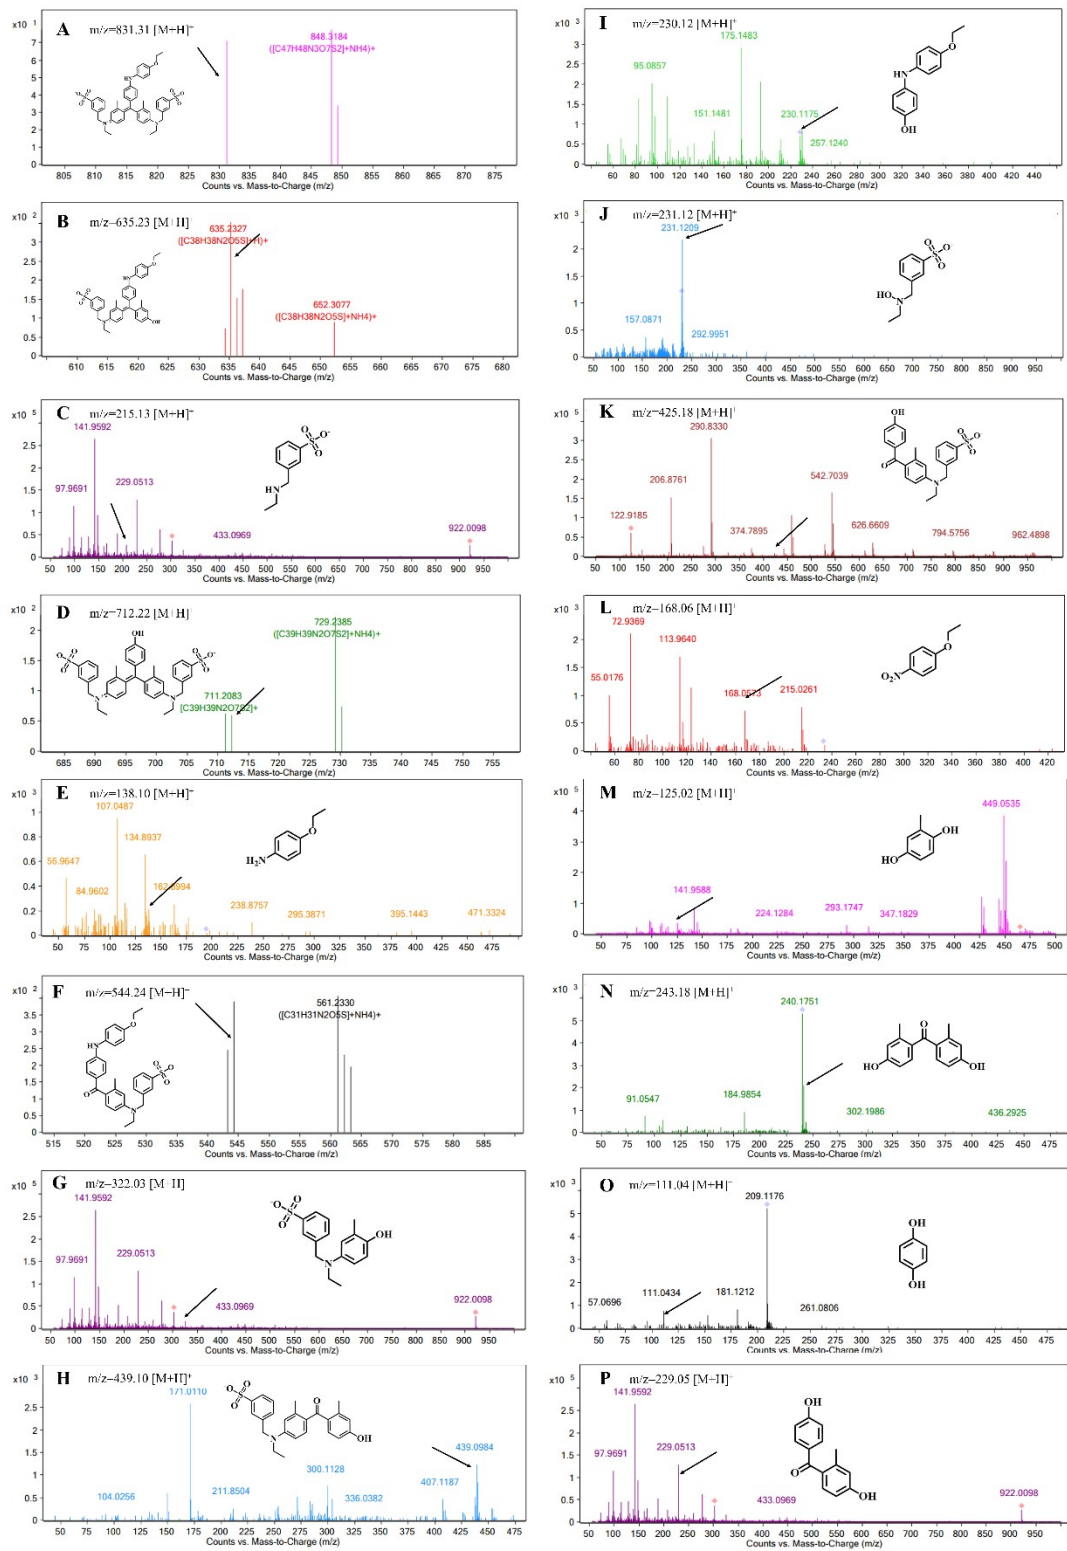

Figure S7 MS data of the CBB sample after treatment with the MGO/PMS system

**Table S1** Properties of the water matrices employed in this work.

|            | pH   | UV254 (AU/cm) | Conductivity (mS/cm) |
|------------|------|---------------|----------------------|
| DI water   | 6.51 | ND            | <10 <sup>-4</sup>    |
| Tap water  | 7.69 | 0.038         | 0.234                |
| Lake water | 7.41 | 0.081         | 0.701                |
| Sea water  | 7.97 | 0.024         | 24.7                 |

**Table S2** XPS deconvolution results of C1s, O1s and Fe2p spectra for fresh and used MGO

| Sample | C1s         |         |         | O1s      |            |         | Fe2p       |             |
|--------|-------------|---------|---------|----------|------------|---------|------------|-------------|
|        | C-C/C=C (%) | C-O (%) | C=O (%) | Fe-O (%) | Fe-O-C (%) | C-O (%) | Fe(II) (%) | Fe(III) (%) |
| fresh  | 54.7        | 25.8    | 19.5    | 49.6     | 20.0       | 30.4    | 34.8       | 65.2        |
| used   | 62.6        | 27.5    | 9.9     | 23.3     | 44.7       | 32.0    | 33.7       | 66.3        |



**Table S3** Condensed Fukui indexes of  $f_{\text{ow}^-}$  and  $f_{\text{ow}^0}$  in CBB

| Atom index | $f_{\text{ow}^-}$ | $f_{\text{ow}^0}$ | Atom index | $f_{\text{ow}^-}$ | $f_{\text{ow}^0}$ |
|------------|-------------------|-------------------|------------|-------------------|-------------------|
| 1(C)       | 0.01419           | 0.04283           | 55(S)      | 0.01374           | 0.00918           |
| 2(C)       | 0.01614           | 0.01978           | 56(O)      | 0.03632           | 0.01923           |
| 3(C)       | 0.01192           | 0.02179           | 57(O)      | 0.03448           | 0.01796           |
| 4(C)       | 0.01210           | 0.02086           | 58(O)      | 0.03365           | 0.01733           |
| 5(C)       | 0.01627           | 0.01813           | 59(C)      | 0.00373           | 0.00398           |
| 7(C)       | 0.01572           | 0.01813           | 63(N)      | 0.02845           | 0.02137           |
| 9(C)       | 0.01087           | 0.02040           | 64(C)      | 0.00467           | 0.00337           |
| 12(C)      | 0.01918           | 0.02030           | 67(C)      | 0.00417           | 0.00279           |
| 13(C)      | 0.01403           | 0.01984           | 71(C)      | 0.00577           | 0.00516           |
| 14(C)      | 0.01418           | 0.01988           | 74(C)      | 0.01518           | 0.01664           |
| 15(C)      | 0.01945           | 0.01800           | 75(C)      | 0.01406           | 0.01721           |
| 17(C)      | 0.02021           | 0.01842           | 76(C)      | 0.01510           | 0.01747           |
| 18(C)      | 0.01165           | 0.01757           | 77(C)      | 0.01355           | 0.01602           |
| 21(C)      | 0.01855           | 0.02065           | 79(C)      | 0.01570           | 0.01763           |
| 22(C)      | 0.01320           | 0.02059           | 81(C)      | 0.01461           | 0.01663           |
| 23(C)      | 0.01379           | 0.02031           | 84(S)      | 0.01385           | 0.00914           |
| 24(C)      | 0.01919           | 0.01803           | 85(O)      | 0.03614           | 0.01901           |
| 26(C)      | 0.01983           | 0.01882           | 86(O)      | 0.03293           | 0.01687           |
| 27(C)      | 0.01078           | 0.01793           | 87(O)      | 0.03595           | 0.01879           |
| 30(C)      | 0.00402           | 0.00409           | 88(N)      | 0.02233           | 0.01954           |
| 34(N)      | 0.02748           | 0.02245           | 90(C)      | 0.01689           | 0.01531           |
| 35(C)      | 0.00439           | 0.00340           | 91(C)      | 0.01617           | 0.01726           |
| 38(C)      | 0.00384           | 0.00263           | 92(C)      | 0.01543           | 0.01667           |
| 42(C)      | 0.00511           | 0.00508           | 93(C)      | 0.01670           | 0.01595           |
| 45(C)      | 0.01449           | 0.01707           | 95(C)      | 0.01698           | 0.01645           |
| 46(C)      | 0.01420           | 0.01811           | 97(C)      | 0.01549           | 0.01453           |
| 47(C)      | 0.01301           | 0.01684           | 100(O)     | 0.02002           | 0.01175           |
| 48(C)      | 0.01517           | 0.01770           | 101(C)     | 0.00356           | 0.00211           |
| 50(C)      | 0.01299           | 0.01627           | 104(C)     | 0.00303           | 0.00178           |
| 52(C)      | 0.01368           | 0.01713           |            |                   |                   |
